# Supplementary material
Source: Springer Nature journal article supplement (https://www.springermedizin.de/resource/supplementary/12904_2006_28_MOESM2_ESM.pdf/9517958)
Supplement: MOESM2 [file 9517958]

## Additional file 2: Details of included studies

| Reference     | Study type                                                                                              | Patients included                                                                      | Number of patients                                             | Technique                                                                                                                                                                                                                     | Duration of catheter                                                                       | Objectives/remarks                                                                                                                                                                                                                                                                            | Results                                                                                                                                                                                         |                                                                                                                                                                                                                                                                                                                                                                                                                                                                                                                                                                                                                                                                         |
|---------------|---------------------------------------------------------------------------------------------------------|----------------------------------------------------------------------------------------|----------------------------------------------------------------|-------------------------------------------------------------------------------------------------------------------------------------------------------------------------------------------------------------------------------|--------------------------------------------------------------------------------------------|-----------------------------------------------------------------------------------------------------------------------------------------------------------------------------------------------------------------------------------------------------------------------------------------------|-------------------------------------------------------------------------------------------------------------------------------------------------------------------------------------------------|-------------------------------------------------------------------------------------------------------------------------------------------------------------------------------------------------------------------------------------------------------------------------------------------------------------------------------------------------------------------------------------------------------------------------------------------------------------------------------------------------------------------------------------------------------------------------------------------------------------------------------------------------------------------------|
|               |                                                                                                         |                                                                                        |                                                                |                                                                                                                                                                                                                               |                                                                                            |                                                                                                                                                                                                                                                                                               | Adverse events                                                                                                                                                                                  | Comments                                                                                                                                                                                                                                                                                                                                                                                                                                                                                                                                                                                                                                                                |
| Aldrete 1998  | Retrospective cohort                                                                                    | Outpatients with severe noncancer pain treated with prolonged epidural infusion        | 504                                                            | 3164 polyamide tunneled lumbar epidural catheters with low dose bupivacaine and fentanyl                                                                                                                                      | Range: 2 to 80 days<br><br>Total or median catheter-days not reported                      | Daily phone calls. Temperature and dressing checked twice a day. Patient to attend facility if lumbar spine pain, headache, drainage on the dressing or temperature elevation above 37.2°C experienced<br><br>Presence of infection confirmed by computer tomography, epidurogram or sonogram | Deep infection: 4<br>a) 2 epidural abscess<br>b) 2 fasciitis<br><br>Superficial infection: 5<br>a) 5 cellulitis                                                                                 | All infections treated with cefuroxime sodium every 8 hours. No patient required surgical intervention<br><br>1462 catheters inserted without antibiotic prophylaxis, resulting in 7 infections (0.4%)<br>1702 catheters inserted with prophylactic antibiotics, resulting in 2 infections (0.11%)<br><br>Staphylococcus epidermidis positive cultures in every case of infection<br><br>Onset of temperature elevation in cases of superficial infection at 11, 21, 24, 27, 29, 42 and 54 days after catheter insertion; and in case of epidural abscess at 38 and 14 days.<br>Persistent fever, headache and leukocytosis most frequently suggested infection present |
| Cherry 1985   | Prospective cohort                                                                                      | Cancer pain patients                                                                   | 50                                                             | Percutaneous implanted port for percutaneous injections 2 to 3 times a day                                                                                                                                                    | Mean duration of the percutaneous implanted port: 12 weeks<br><br>Maximal: up to 9 months. |                                                                                                                                                                                                                                                                                               | Deep infection: 0 (no meningitis)<br><br>Superficial infection: 2 (diabetic patients)                                                                                                           |                                                                                                                                                                                                                                                                                                                                                                                                                                                                                                                                                                                                                                                                         |
| Crawford 1983 | Retrospective cohort multicentre registration study with eight major Danish anaesthesiology departments | Cancer pain patients with chronic malignant pain and patients with benign chronic pain | cancer pain: 94<br>painful benign disease:11<br><br>Total: 105 | No information                                                                                                                                                                                                                | Mean: 65 days<br><br>Range: 7 to 283 days                                                  |                                                                                                                                                                                                                                                                                               | Deep infection: 0<br>One patient with septicemia with a non-fatal outcome, probably originating from some other focus. Apart from this no serious side effects. Consequently no deep infection. | Bacteriological examination of 15 catheter tips revealed 5 cultures with growth of Staphylococcus albus (without clinical signs of infection) and 1 culture with Staphylococcus aureus and concomitant septicemia                                                                                                                                                                                                                                                                                                                                                                                                                                                       |
| Crul 1991     | Retrospective cohort                                                                                    | Terminally ill cancer pain patients                                                    | 110                                                            | 15 patients with portable mini infusion pumps<br>95 patients received intermittent bolus injections<br><br>20 patients tunneled, 90 patients not tunneled<br><br>30 patients included with subarachnoidal morphine injections | Range: 10 to 366 days<br><br>Total treatment days: 8650 (6175 spent at home)               |                                                                                                                                                                                                                                                                                               | Deep infection: 0<br><br>Superficial infection: 5<br>a) 1 in the tunneled catheter (n = 15)<br>b) 4 in the nontunneled catheter (n=95)                                                          | Outcome of 5 local skin infections not reported.<br><br>During initial period of treatment complication rate in epidural group lower than in subarachnoid group, but after three weeks complication rate in epidural group increased dramatically (epidural fibrosis?)                                                                                                                                                                                                                                                                                                                                                                                                  |

|              |                      |                                                                         |                                            |                                                                                                                                                                                                                                                                                                                                                              |                                                                                                                                                                                                                                                                                            |                                                                                                                                                                                                                                                                                                                                                                    |                                                                                                                                                                                                                                                                                                                                                           |                                                                                                                                                                                                                                                                                                                                                                                                                                                                                                                                                                                                                     |
|--------------|----------------------|-------------------------------------------------------------------------|--------------------------------------------|--------------------------------------------------------------------------------------------------------------------------------------------------------------------------------------------------------------------------------------------------------------------------------------------------------------------------------------------------------------|--------------------------------------------------------------------------------------------------------------------------------------------------------------------------------------------------------------------------------------------------------------------------------------------|--------------------------------------------------------------------------------------------------------------------------------------------------------------------------------------------------------------------------------------------------------------------------------------------------------------------------------------------------------------------|-----------------------------------------------------------------------------------------------------------------------------------------------------------------------------------------------------------------------------------------------------------------------------------------------------------------------------------------------------------|---------------------------------------------------------------------------------------------------------------------------------------------------------------------------------------------------------------------------------------------------------------------------------------------------------------------------------------------------------------------------------------------------------------------------------------------------------------------------------------------------------------------------------------------------------------------------------------------------------------------|
| de Jong 1994 | Retrospective cohort | Cancer pain patients                                                    | percutaneous catheter: 98<br>ports: 52     | <p>Epidural catheters inserted under aseptic conditions in operating room.</p> <p>Most percutaneous catheters not tunneled</p> <p>Antibiotic use for injection port implantation initially only for those with prior infection, then for all in last 18 months</p> <p>catheters:<br/>48% lumbar<br/>26% lower thoracic level<br/>2% upper thoracic level</p> | <p>Mean duration of treatment in injection port group: 23 days</p> <p>Mean duration of treatment in injection group: 47 days (more than twice as long as in the port group)</p> <p>Total treatment days in the nonport group: 4520</p> <p>Total treatment days in the port group: 2449</p> | <p>Prior definitions of:<br/>a) subcutaneous infection (purulent exudate from entry site and sign of inflammation of surrounding skin)<br/>b) injection port infection (infection at port or somewhere along trajectory between port and epidural space)<br/>c) major infection (meningitis, epidural abscess)</p>                                                 | <p>Deep infections: 3<br/>a) 1 meningitis<br/>b) 1 abscess<br/>c) 1 infiltration without clear abscess</p> <p>Superficial infection: no data</p> <p>Overall 13.6% of catheters became infected for subcutaneous ports and percutaneous catheters<br/>2.9 infections per 1000 catheter days in subcutaneous ports versus 5.9 in percutaneous catheters</p> | <p>Injection ports did not become infected during the first 70 days</p> <p>1 patient in the percutaneous group developed clinical symptoms of meningitis, which warranted catheter removal</p> <p>1 patient in the terminal phase of cancer developed an epidural abscess 70 days after injection port implantation. One week later the patient became septic and died</p> <p>1 patient with suspicion of epidural abscess, but confirmed as "infiltration" by laminectomy</p> <p>Infection rate in tunneled percutaneous catheters was 20% compared with 12% in untunneled (not significant, no numbers given)</p> |
| Du Pen 1990  | Retrospective cohort | Terminal disease: mostly cancer pain patients, with a few AIDS patients | cancer pain: 339<br>AIDS: 11<br>Total: 350 | <p>Du Pen-catheters tunneled from superficial site</p>                                                                                                                                                                                                                                                                                                       | <p>Total treatment days: 32354</p> <p>Range: 4 to 1460</p> <p>99,239 injections</p>                                                                                                                                                                                                        | <p>Suspicion of deep infection investigated with pre-set definitions, investigations and procedures:<br/>a) physical and neurological examination<br/>b) exit site culture<br/>c) aspiration of catheter and culture after removal<br/>d) x-ray of epidural site with contrast medium<br/>e) MRI in case of abscess<br/>f) blood culture if infection systemic</p> | <p>Deep infection: 23<br/>a) 15 epidural space infections<br/>b) 8 deep catheter track infections</p> <p>Superficial infection: 30 (exit site or superficial epidural catheter track infections)</p>                                                                                                                                                      | <p>Onset of infections varied from day 7 to day 457. Time of onset seemed not to be related to duration of catheter placement</p> <p>No patients required surgical decompression, died from complications related to the epidural infections, or showed MRI or epidurogram abnormalities after antibiotic therapy.</p>                                                                                                                                                                                                                                                                                              |
| Erdine 1991  | Prospective cohort   | Cancer pain patients                                                    | 225                                        | <p>175 patients: percutaneously implanted tunneled catheters</p> <p>50 patients: subcutaneous reservoirs</p> <p>156 patients: lumbar catheters<br/>69 patients: low thoracic level catheters</p>                                                                                                                                                             | <p>Mean: 47.3 days</p> <p>Range: 7 to 420 days</p>                                                                                                                                                                                                                                         |                                                                                                                                                                                                                                                                                                                                                                    | <p>Deep infection: 0</p> <p>Superficial infection: 9 (skin surrounding the entrance port of the catheter infected (4%))</p> <p>Epidural haematoma: 2 (0.88%)</p>                                                                                                                                                                                          | <p>No precise comment on outcome of infected patients</p>                                                                                                                                                                                                                                                                                                                                                                                                                                                                                                                                                           |

|              |                                                                             |                                                                                                                |                                                                                                                                 |                                                                                                                                                                                                                        |                                                                                                                                                                                                                                                |                                                                                                                                                                                                                                                                                                                                                                                                                                                                                                                                                             |                                                                                                                                                                                                                                                                                                                                                                                                                                                                                                                                                  |
|--------------|-----------------------------------------------------------------------------|----------------------------------------------------------------------------------------------------------------|---------------------------------------------------------------------------------------------------------------------------------|------------------------------------------------------------------------------------------------------------------------------------------------------------------------------------------------------------------------|------------------------------------------------------------------------------------------------------------------------------------------------------------------------------------------------------------------------------------------------|-------------------------------------------------------------------------------------------------------------------------------------------------------------------------------------------------------------------------------------------------------------------------------------------------------------------------------------------------------------------------------------------------------------------------------------------------------------------------------------------------------------------------------------------------------------|--------------------------------------------------------------------------------------------------------------------------------------------------------------------------------------------------------------------------------------------------------------------------------------------------------------------------------------------------------------------------------------------------------------------------------------------------------------------------------------------------------------------------------------------------|
| Holt 1995    | Prospective cohort<br>Laboratory examination of epidural catheter tips (EC) | Cancer pain patients and perioperative pain patients.<br><br>Patients with culture positive epidural catheters | Perioperative, cancer and non-cancer pain: approximately 1000                                                                   | 78 catheters with positive culture were examined.<br><br>Only 5 of the 78 catheters with positive cultures were tunneled.<br><br>44 catheters connected to an external injection port, 33 to an external infusion pump | Total treatment days: 11901<br><br>Duration of catheterization:<br>a) generalized symptoms: median 15 days, range 5 to 270 days<br>b) local symptoms: median 8 days, range 1 to 132 days<br>c) no symptoms: median 12 days, range 2 to 35 days | Deep infection: 11 (11 with central nervous system involvement, 2 of whom had epidural abscess)<br><br>Superficial infection: 36<br><br>59 of 78 patients had clinical symptoms, remaining 19 had no clinical symptoms.<br>23 of 59 patients had generalized symptoms of infection (11 had deep infection, 12 had various symptoms).<br>53 of 59 patients with clinical symptoms had superficial infections including 17 patients with deep infection generalized symptoms. So 36 (53-17) patients had a "pure" superficial infection.<br>Deep infection: 0 | 147 EC tips from 1000 patients investigated, giving 78 cases with positive cultures.<br>37 of these 78 catheters used in anaesthesia and postoperative analgesia: chronic pain 41, malignant pain 14, nonmalignant pain 27 patients.<br><br>Patients with generalized symptoms of infection had been catheterized for a longer time and were older than patients with only local symptoms.<br>48 of 59 patients (81%) developed symptoms of infection between day 4 and day 35 after catheter insertion<br><br>No comment on outcome of patients |
| Maier 1994   | Retrospective cohort                                                        | Perioperative pain patients                                                                                    | 1621                                                                                                                            | Lumbar catheters : 72.6%<br><br>Thoracic catheters: 27.4%                                                                                                                                                              | Total treatment days: 12540<br><br>Mean: 7 days<br><br>Range: 1 to 53 days                                                                                                                                                                     | Superficial infection: 46 (one subcutaneous abscess)                                                                                                                                                                                                                                                                                                                                                                                                                                                                                                        | No comment on outcomes<br><br>Duration >3 days did not increase risk of infection<br>Authors argue that a median duration of 4 to 7 days is necessary to achieve adequate pain therapy. 49% of the patients needed more than 6 days                                                                                                                                                                                                                                                                                                              |
| Plummer 1991 | Retrospective cohort                                                        | Cancer pain patients                                                                                           | 284 patients (313 in total, but 17 cancer patients had intrathecal therapy and 12 non-cancer patients had intrathecal morphine) | Epidural catheters with subcutaneous implanted port-a-cath system                                                                                                                                                      | Mean duration of the port-a-cath catheter: 96 days<br><br>Range: 1 to 1215 days                                                                                                                                                                | Indications:<br>199: inadequate pain control<br>133: excessive side effects with conventional therapy                                                                                                                                                                                                                                                                                                                                                                                                                                                       | Deep infection: 1 (1 case of meningitis which occurred after the epidural catheter had been resited intrathecally)<br><br>Superficial infection: 22<br><br>All infections without sequelae following removal and/or administration of antibiotics<br>7 cases required repositioning of the epidural catheter because of infection. 19 cases required removal of port-a-caths because of infection.                                                                                                                                               |

|            |                      |                      |                            |                                                                                                                                                                                                                    |                                                                                                                                                                                                                                                                                                            |                                                                                                                                                                                                                                                                                                                                                                                                                                                                       |                                                                                                                                                  |                                                                                                                                                                                                                                                                                                                                                                                                                                                                                                                                                                                                                                                                                                                                                                                                                                                                                   |
|------------|----------------------|----------------------|----------------------------|--------------------------------------------------------------------------------------------------------------------------------------------------------------------------------------------------------------------|------------------------------------------------------------------------------------------------------------------------------------------------------------------------------------------------------------------------------------------------------------------------------------------------------------|-----------------------------------------------------------------------------------------------------------------------------------------------------------------------------------------------------------------------------------------------------------------------------------------------------------------------------------------------------------------------------------------------------------------------------------------------------------------------|--------------------------------------------------------------------------------------------------------------------------------------------------|-----------------------------------------------------------------------------------------------------------------------------------------------------------------------------------------------------------------------------------------------------------------------------------------------------------------------------------------------------------------------------------------------------------------------------------------------------------------------------------------------------------------------------------------------------------------------------------------------------------------------------------------------------------------------------------------------------------------------------------------------------------------------------------------------------------------------------------------------------------------------------------|
| Smitt 1998 | Retrospective cohort | Cancer pain patients | 91 patients: 137 epidurals | <p>All catheters inserted in the operating room under aseptic conditions.</p> <p>19 patients received implanted subcutaneous port</p> <p>Prophylactic antibiotics used only for subcutaneous port implantation</p> | <p>Total treatment days: 4326</p> <p>Median patient survival: 38 days</p> <p>Range survival: 1 to over 1000 days</p>                                                                                                                                                                                       | <p>Prior definitions of:</p> <p>a) Superficial infection (purulent drainage or cutaneous inflammation at exit site)</p> <p>b) Tunnel infection (inflammation along the catheter tunnel)</p> <p>c) Pocket infection (purulent collection in subcutaneous port pocket)</p> <p>d) Epidural space infection (epidural collection on MRI combined with isolation of microorganisms from epidural fluid or catheter tip)</p> <p>e) Abscesses were determined by imaging</p> | <p>Deep infection: 12 (11 of whom had a spinal epidural abscess)</p> <p>Superficial infection: 39</p>                                            | <p>43% of patients had mild superficial infection. No tunnel or subcutaneous pocket infections. Life threatening deep infections occurred in 13% of patients.</p> <p>Serious deep infection present in 12 patients. 11 had epidural infection, one with meningitis. Remaining patient had abscess in paravertebral muscles of lumbar spine. The abscesses occurred after a median of 37 days (range 10 to 165). All 12 deep infections treated with intravenous antibiotics and 4 patients underwent additional decompressive laminectomy. Outcome: 3 died within 1 week after conservative therapy, remaining 9 recovered completely from their neurologic symptoms.</p> <p>Risk factor analysis shows significant association between risk of deep infection and pump speed.</p> <p>Adequate pain relief achieved in 76% for nociceptive pain and 73% for neuropathic pain.</p> |
| Zenz 1985  | Prospective cohort   | Cancer pain patients | 139                        | <p>Catheter fixed 1 cm distally to the puncture site by a skin suture</p> <p>139 patients had 238 catheters inserted</p> <p>Lumbar: 196<br/>Thoracic: 39<br/>Caudal: 2<br/>Cervical: 1</p>                         | <p>Total of 9716 treatment days<br/>Mean: 72 days (referring to patients)</p> <p>Range 1 to 700 days</p> <p>34 patients treated for more than 100days, 21 for more than 150 days</p> <p>26 catheters in place for more than 100 days, one for 501 days</p> <p>Range of catheter duration 1 to 501 days</p> |                                                                                                                                                                                                                                                                                                                                                                                                                                                                       | <p>Deep infection: 2 (meningitis, both free of symptoms after catheter removal and antibiotic therapy)</p> <p>Superficial infection: no data</p> |                                                                                                                                                                                                                                                                                                                                                                                                                                                                                                                                                                                                                                                                                                                                                                                                                                                                                   |
